# Supplementary material
Source: PubMed Central journal article supplement (PMC5683071)
Supplement: NIHMS917131-supplement-Sup_Fig_2.pdf [file NIHMS917131-supplement-Sup_Fig_2.pdf]

Supplementary Figure 2

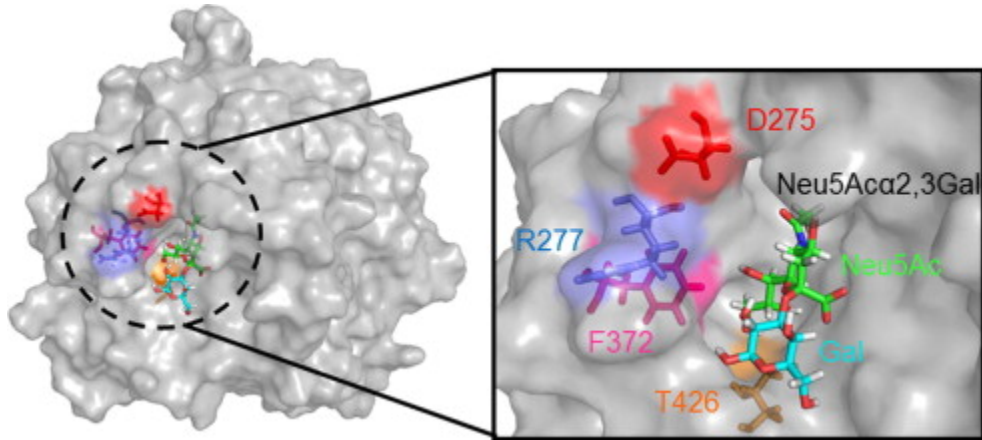

Supplementary Fig. 2. Docking pose of  $\alpha$ 2,3-linked sialic acid with galactose to the sialic acid binding pocket of the HN3 glycoprotein. Green and aqua blue indicate sialic acid and galactose, respectively. D275, R277, F372, and T426 are amino acid residues in the sialic acid binding pocket.
