# Supplementary material
Source: PubMed Central journal article supplement (PMC5683071)
Supplement: NIHMS917131-supplement-Sup_Table_1.pdf [file NIHMS917131-supplement-Sup_Table_1.pdf]

## Supplementary Table 1

**Supplementary Table I.** PCR primer sequences used in site-directed mutagenesis.

| Mutations       | Primer sequences                                                                           |
|-----------------|--------------------------------------------------------------------------------------------|
| T193L           | GGCTGTGTTAGACTGCCGTCCTTAAGTTATAAATG<br>CATTTATAACTTAAGGACGGCAGTCTAACACAGCC                 |
| Q215F           | CTAATTACTCGAGGTTGCGCGGATATAGGAAAATCATATCAAG<br>CTTGATATGATTTTCCTATATCCGCGCAACCTCGAGTAATTAG |
| D275N/<br>R277T | CGACTCCCAAAGTTAATGAAACTTCAGATTATGCATC<br>GATGCATAATCTGAAGTTTCATTAACCTTGGGAGTCG             |
| F372L           | CATAGTCCCTGGCTTTCAGACAGAAGGATG<br>CATCCTTCTGTCTGAAAGCCAGGGACTATG                           |
| S408A           | GACAAAATTACTGGGGGGCTGAAGGAAGGC<br>GCCTTCCTTCAGCCCCCAGTAATTTTGTC                            |
| T426S           | CTATATATATAACAAGATCTAGCAGTTGGCATAGCAAGTTAC<br>GTAACCTGCTATGCCAACTGCTAGATCTTGTATATATATAG    |
| T475S           | CCAGATGGATGTATATCAGGAGTATATACTG<br>CAGTATATACTCTGATATACATCCATCTGG                          |
| G529A           | CAAAACACTCTCAGCTGCATATACAACAACGAGC<br>GCTCGTTGTTGTATATGCAGCTGAGAGTGTTTTG                   |
